# Supplementary material
Source: PubMed Central journal article supplement (PMC5026619)

## Supplemental Figures/Tables

### Supplementary Tables

**Table S1. Primer sequences**

| <b>MSP Primers</b>       |                       |                                       |
|--------------------------|-----------------------|---------------------------------------|
| SPARC2                   | Unmethylation forward | TTTTTTAGATTGTTTGGAGAGTG               |
|                          | Unmethylation reverse | AACTAACACATAAACAAAAATATC              |
|                          | Methylation forward   | GAGAGCGCGTTTTGTTTGTC                  |
|                          | Methylation reverse   | AACGACGTAAACGAAAATATCG                |
| CDH1                     | Unmethylation forward | TGGTTGTAGTTATGTATTTATTTTAGTGGTGT<br>T |
|                          | Unmethylation reverse | ACACCAAATACAATCAAATCAAACCAA           |
|                          | Methylation forward   | TGTAGTTACGTATTTATTTTAGTGGCGTC         |
|                          | Methylation reverse   | CGAATACGATCGAATCGAACCG                |
| CCND2                    | Unmethylation forward | TGGTGTGGTTATGTTTAGTG                  |
|                          | Unmethylation reverse | ACAATACAACATCTAAAACCAC                |
|                          | Methylation forward   | TCGGTGTGGTTACGTTTAGC                  |
|                          | Methylation reverse   | TAAAACGACGCGATACAACG                  |
| SFRP2                    | Unmethylation forward | GGGTGTATTTAGTTTGTAGTG                 |
|                          | Unmethylation reverse | CAATCCCCCAACCAATAAC                   |
|                          | Methylation forward   | GTCGGGGCGTATTTAGTTC                   |
|                          | Methylation reverse   | TCCCCCGACCAATAACG                     |
| RARB                     | Unmethylation forward | TTGGGATGTTGAGAATGTGAGTGATTT           |
|                          | Unmethylation reverse | CTTACTCAACCAATCCAACCAAAACAA           |
|                          | Methylation forward   | TGTCGAGAACGCGAGCGATTC                 |
|                          | Methylation reverse   | CGACCAATCCAACCGAAACGA                 |
| PENK                     | Unmethylation forward | TTGTGTGGGGAGTTATTGAGT                 |
|                          | Unmethylation reverse | CACCTTCACAAAAAAATCAATC                |
|                          | Methylation forward   | TGTGGGGAGTTATCGAGC                    |
|                          | Methylation reverse   | GCCTTCGCGAAAAAAATCG                   |
| SOCS1                    | Unmethylation forward | TTATGAGTATTTGTGTATTTTAGGTTGGTT        |
|                          | Unmethylation reverse | CACTAACACACAACCTCCTACAACAACCA         |
|                          | Methylation forward   | TTCGCGTGTATTTTAGGTCGGTC               |
|                          | Methylation reverse   | CGACACAACCTCCTACAACGACCG              |
| ST14                     | Unmethylation forward | GTGTTAGGGTGAGGGTATTG                  |
|                          | Unmethylation reverse | ACTCACAAATCTCACAAACATC                |
|                          | Methylation forward   | CGTTAGGGCGAGGGTATC                    |
|                          | Methylation reverse   | CTCGCGAATCTCACAAACG                   |
| <b>MethySYBR Primers</b> |                       |                                       |
| SOCS1                    | Methylation forward   | TTCGCGTGTATTTTAGGTCGGTC               |
|                          | Methylation reverse   | CGACACAACCTCCTACAACGACCG              |

|                                               |                          |                                          |
|-----------------------------------------------|--------------------------|------------------------------------------|
| ALU                                           | Methylation forward      | GGTTAGGTATAGTGGTTTATATTTGTAATTTTAGT<br>A |
|                                               | Methylation reverse      | ATTA ACTAAACTAATCTTAAACTCCTAACCTCA       |
| ST14                                          | Methylation forward      | CGTTAGGGCGAGGGTATC                       |
|                                               | Methylation reverse      | CTCGCGAATCTCACAAACG                      |
| <b>Quantitative SYBR Green RT-PCR primers</b> |                          |                                          |
| IGF1                                          | Qiagen: QT00029785       |                                          |
| DNMT1                                         | Qiagen: QT00034335       |                                          |
| DNMT3a                                        | Qiagen: QT00090832       |                                          |
| DNMT3b                                        | Qiagen: QT00032067       |                                          |
| <b>Quantitative Taqman RT-PCR primers</b>     |                          |                                          |
| SOCS1                                         | Life Technology: 4331182 |                                          |
| GAPDH                                         | Life Technology: 4352934 |                                          |
| <b>Pryosequencing Primers</b>                 |                          |                                          |
| SOCS1                                         | Qiagen: PM00176785       |                                          |

**Table S2. Promoter methylation status of 8 genes in 3 paired primary PDAC cells and CAFs measured by methylation specific PCR**

| Patient ID |     |     |     | 3.30  |     | 3.27  |     | 1.30  |     |
|------------|-----|-----|-----|-------|-----|-------|-----|-------|-----|
|            | H2O | DKO | IVD | Tumor | CAF | Tumor | CAF | Tumor | CAF |
| SPARC2     | -   | U   | M   | M     | U   | M     | U   | U     | M   |
| CDH1       | -   | U   | M   | M     | M   | M     | M   | M     | M   |
| CCND2      | -   | U   | M   | M     | M   | M     | M   | M     | M   |
| SFRP2      | -   | U   | M   | M     | U   | M     | M   | M     | M   |
| RARB       | -   | U   | M   | M     | M   | M     | M   | M     | U   |
| PENK       | -   | U   | M   | M     | U   | M     | U   | M     | U   |
| SOCS1      | -   | U   | M   | U     | U   | U     | M   | U     | M   |
| ST14       | -   | U   | M   | U     | U   | U     | U   | U     | U   |

**Table S3. SOCS1 methylation analyzed by pryosequencing in stroma dissected from PDAC tissues\***

| <b>SOCS1 Methylation(%)</b> |                   |                   |                   |                   |                   |
|-----------------------------|-------------------|-------------------|-------------------|-------------------|-------------------|
| <b>Samples</b>              | <b>Position 1</b> | <b>Position 2</b> | <b>Position 3</b> | <b>Position 4</b> | <b>Position 5</b> |
| 1                           | 86                | 52                | 81                | 78                | 29                |
| 2                           | 32                | 15                | 52                | 49                | 47                |
| 3                           | 5                 | 3                 | 18                | 5                 | 5                 |
| 4                           | 54                | 95                | 19                | 92                | 95                |
| 5                           | 50                | 42                | 51                | 55                | 48                |
| 6                           | 67                | 42                | 49                | 43                | 16                |
| 7                           | 45                | 36                | 59                | 58                | 53                |
| 8                           | 47                | 47                | 48                | 48                | 50                |
| 9                           | 56                | 23                | 42                | 39                | 50                |
| 10                          | 54                | 54                | 53                | 51                | 57                |
| 11                          | 48                | 32                | 58                | 67                | 30                |
| 12                          | 65                | 57                | 77                | 73                | 69                |
| 13                          | 37                | 35                | 48                | 49                | 44                |
| 14                          | 35                | 32                | 96                | 55                | 80                |
| 15                          | 64                | 40                | 82                | 75                | 65                |
| 16                          | 22                | 29                | 45                | 47                | 50                |

\*Intratumoral areas were circled by pathologist (R.A. Anders) to identify tumor epithelial and stromal regions suitable for microdissection. Microdissection was performed with the use of Leica LMD 7000 dissecting system (Leica Microsystems).

**Table S4 Pyrosequencing results of five methylation sites on the *SOCS1* promoter in MSCs or CAFs\* before or after co-culture with human PDAC cells.**

| <b>SOCS1 Methylation(%)</b> |            |                   |                  |
|-----------------------------|------------|-------------------|------------------|
| <b>Position</b>             | <b>MSC</b> | <b>MSC+10.05T</b> | <b>MSC+3.27T</b> |
| 1                           | 19         | 66                | 51               |
| 2                           | 16         | 66                | 38               |
| 3                           | 22         | 68                | 55               |
| 4                           | 24         | 71                | 54               |
| 5                           | 17         | 77                | 70               |

\*Representative results are shown. Noted that even DNMT inhibitor treated cells would have a baseline value of methylation at 0-20% (Supplementary Fig. S1).

**Table S5. A list of clusters with a minimum of 5 genes that are both methylated and downregulated in CAFs upon interacting with PDAC tumor cells**

| Chr*  | Begin†    | End‡      | p-value§ | Genes clustered                                               |
|-------|-----------|-----------|----------|---------------------------------------------------------------|
| chr1  | 18306826  | 19878641  | 1.78e-02 | <i>IGSF21 HTR6 TAS1R2 CAPZB C1orf151</i>                      |
| chr1  | 20751518  | 22802674  | 1.78e-02 | <i>EPHA8 NBPF3 FAM43B CDC42 HSPG2 USP48</i>                   |
| chr1  | 25537397  | 26401619  | 1.78e-02 | <i>TMEM50A GRRP1 SLC30A2 TMEM57 CATSPER4</i>                  |
| chr1  | 36462633  | 39725376  | 5.84e-04 | <i>INPP5B RSPO1 MACF1 C1orf122 YRDC THRAP3 CDCA8 EPHA10</i>   |
| chr1  | 114433437 | 116185270 | 1.78e-02 | <i>VANGL1 NHLH2 SYT6 TRIM33 SYCP1</i>                         |
| chr1  | 154545375 | 154913813 | 1.78e-02 | <i>NES CCT3 MEF2D C1orf61 RHBG</i>                            |
| chr10 | 43009989  | 46061009  | 2.63e-04 | <i>ZNF485 C10orf25 RASGEF1A MARCH8 PTPN20B ZNF22</i>          |
| chr10 | 59625619  | 69125933  | 3.67e-02 | <i>ANK3 TMEM26 CTNNA3 IPMK C10orf107 ZNF365</i>               |
| chr10 | 119291945 | 122339357 | 3.67e-02 | <i>EMX2 PRDX3 PPAPDC1A GRK5 SEC23IP</i>                       |
| chr10 | 131523536 | 134889906 | 3.67e-02 | <i>STK32C KNDC1 PPP2R2D INPP5A EBF3</i>                       |
| chr11 | 2355122   | 4071015   | 7.57e-04 | <i>TRPM5 ART5 STIM1 KCNQ1 ART1 CD81 NAP1L4</i>                |
| chr11 | 10775169  | 17455025  | 4.49e-03 | <i>INSC C11orf58 ABCC8 PARVA PTH CALCA MICALCL EIF4G2</i>     |
| chr11 | 33235743  | 34450179  | 2.14e-02 | <i>ABTB2 CAT HIPK3 C11orf41 CD59</i>                          |
| chr11 | 43658718  | 46358680  | 2.14e-02 | <i>DGKZ MAPK8IP1 EXT2 ALKBH3 GYLTL1B HSD17B12</i>             |
| chr11 | 59353323  | 59994800  | 4.49e-03 | <i>MS4A4A MS4A3 GIF MS4A6E MS4A7 MS4A1</i>                    |
| chr11 | 125658191 | 133787022 | 4.49e-03 | <i>B3GAT1 GLB1L3 APLP2 ACAD8 TIRAP PRDM10 ADAMTS8 FLI1</i>    |
| chr12 | 384938    | 2814450   | 4.23e-02 | <i>DCP1B NINJ2 NRIP2 CACNA1C CCDC77</i>                       |
| chr12 | 6431510   | 7172733   | 1.07e-02 | <i>RBP5 VAMP1 PTMS TAPBPL C12orf53 ATN1 GPR162 CD4 LRRC23</i> |
| chr12 | 9639137   | 10174135  | 1.07e-02 | <i>CD69 CLEC2B CLEC12A CLEC1A CLEC7A KLRB1</i>                |
| chr12 | 55768943  | 56297293  | 4.23e-02 | <i>NAB2 LRP1 ARHGAP9 MBD6 GEFT</i>                            |
| chr12 | 100512877 | 102413879 | 4.23e-02 | <i>CHPT1 IGF1 ASCL1 MYBPC1 C12orf42</i>                       |
| chr12 | 123374914 | 131256526 | 2.17e-03 | <i>GALNT9 GLT1D1 NCOR2 SLC15A4 MMP17 GPR133 RIMBP2 DDX51</i>  |
| chr13 | 47414792  | 51483631  | 2.71e-03 | <i>RCBTB2 PHF11 INTS6 SUCLA2 ATP7B CAB39L FNDC3A RCBTB1</i>   |
| chr14 | 80491621  | 89808717  | 3.99e-04 | <i>FOXN3 TTC8 C14orf143 PSMC1 KCNK10 SEL1L TSHR</i>           |
| chr14 | 91858677  | 93493520  | 1.48e-02 | <i>PRIMA1 ASB2 SLC24A4 LGMN KIAA1409</i>                      |
| chr15 | 49802553  | 53487866  | 3.92e-02 | <i>ONECUT1 MYO5A LYSDM2 GNB5 CCPG1</i>                        |
| chr15 | 72005841  | 72911189  | 3.92e-02 | <i>CCDC33 CSK CPLX3 CYP11A1 LOXL1</i>                         |
| chr15 | 77041340  | 81744472  | 9.49e-03 | <i>KIAA1199 IL16 TMC3 EFTUD1 RASGRF1 TMED3 BNC1 AP3B2</i>     |
| chr16 | 1388307   | 1830173   | 2.99e-03 | <i>HAGH CRAMP1L UNKL EME2 IFT140 FAHD1</i>                    |
| chr16 | 2672498   | 3050723   | 1.57e-02 | <i>KCTD5 TCEB2 CLDN9 CLDN6 MMP25</i>                          |
| chr17 | 19081282  | 21263772  | 4.35e-03 | <i>ALDH3A1 MAPK7 KCNJ12 EPN2 TMEM11 DHRS7B</i>                |
| chr17 | 53295335  | 54417314  | 2.09e-02 | <i>CUEDC1 OR4D1 OR4D2 TEX14 PPM1E</i>                         |

|       |           |           |          |                                                                                  |
|-------|-----------|-----------|----------|----------------------------------------------------------------------------------|
| chr17 | 74597021  | 76705827  | 2.09e-02 | <i>NPTX1 CCDC40 HRNBP3 BAIAP2 ENPP7</i>                                          |
| chr19 | 12768634  | 13070609  | 2.22e-02 | <i>GADD45GIP1 KLF1 MAST1 NFIX PRDX2</i>                                          |
| chr19 | 38391410  | 40352625  | 2.22e-02 | <i>KCTD15 UBA2 SLC7A10 FXYD5 HPN ZNF30 GRAMD1A</i>                               |
| chr19 | 58715988  | 59418771  | 2.22e-02 | <i>ZNF331 CACNG8 PRPF31 TSEN34 LILRB3</i>                                        |
| chr2  | 43311478  | 47563864  | 1.87e-02 | <i>RHOQ THADA EPAS1 MSH2 PLEKHH2 SIX2 TTC7A</i>                                  |
| chr2  | 100256184 | 102162765 | 1.87e-02 | <i>NPAS2 MAP4K4 LONRF2 IL1R1 CHST10</i>                                          |
| chr2  | 158097149 | 162808291 | 1.87e-02 | <i>FAP ACVR1C SLC4A10 DPP4 RBMS1 CD302</i>                                       |
| chr2  | 191818374 | 200033446 | 1.87e-02 | <i>MOBK13 HECW2 PGAP1 MYO1B SATB2 ANKRD44</i>                                    |
| chr2  | 218790118 | 219566371 | 1.87e-02 | <i>SLC11A1 PLCD4 CTDSP1 RQCD1 ARPC2 CRYBA2</i>                                   |
| chr2  | 241174817 | 242261937 | 1.87e-02 | <i>PPP1R7 SNED1 FARP2 ATG4B CAPN10</i>                                           |
| chr20 | 16658628  | 18413284  | 3.93e-02 | <i>PCSK2 OTOR SNRPB2 C20orf12 POLR3F</i>                                         |
| chr20 | 35406501  | 41251971  | 3.93e-02 | <i>CHD6 BPI TOP1 SRC BLCAP SLC32A1 PTPRT</i>                                     |
| chr21 | 45013383  | 46542092  | 1.99e-02 | <i>UBE2G2 PTTG1IP COL6A2 C21orf56 C21orf57</i>                                   |
| chr3  | 8997277   | 10297900  | 1.72e-02 | <i>TATDN2 OGG1 PRRT3 SRGAP3 RPUSD3 IL17RE</i>                                    |
| chr3  | 172801344 | 180435189 | 1.72e-02 | <i>NLGN1 PLD1 FNDC3B SPATA16 PIK3CA</i>                                          |
| chr3  | 195596838 | 197422697 | 1.72e-02 | <i>C3orf21 GP5 TNK2 ZDHHC19 TMEM44</i>                                           |
| chr4  | 85633459  | 89424771  | 3.72e-03 | <i>AFF1 C4orf36 ARHGAP24 NKX6-1 PPM1K SPARCL1 ABCG2</i>                          |
| chr4  | 174684227 | 184075624 | 1.87e-02 | <i>ODZ3 HAND2 GPM6A VEGFC DCTD</i>                                               |
| chr5  | 140154627 | 140872730 | 2.71e-03 | <i>PCDHB11 PCDHA7 PCDHB2 PCDHB16 PCDHA2 PCDHA6 PCDHA12 PCDHB5 PCDHGA1 PCDHB1</i> |
| chr5  | 176959777 | 179568736 | 1.29e-02 | <i>ZNF354A ADAMTS2 B4GALT7 ZNF354C GRM6 RASGEF1C COL23A1</i>                     |
| chr6  | 30621674  | 31029977  | 1.74e-02 | <i>C6orf134 TUBB PRR3 GNL1 KIAA1949 DPCR1</i>                                    |
| chr6  | 55147029  | 73962300  | 1.74e-02 | <i>KHDRBS2 GFRAL COL9A1 HCRTR2 RIMS1 BAI3 DST BAG2 KCNQ5</i>                     |
| chr6  | 143114297 | 149439818 | 3.97e-03 | <i>PHACTR2 FBXO30 RAB32 PLAGL1 SASH1 UST HIVEP2</i>                              |
| chr7  | 75794052  | 86942955  | 7.08e-03 | <i>UPK3B YWHAG ABCB4 CACNA2D1 GRM3 SRCRB4D HGF SEMA3D C7orf23</i>                |
| chr7  | 100037925 | 100331477 | 3.08e-02 | <i>ZAN PCOLCE ACHE TFR2 ACTL6B</i>                                               |
| chr7  | 102899472 | 106589491 | 3.08e-02 | <i>RELN PIK3CG LHFPL3 SYPL1 PRKAR2B</i>                                          |
| chr7  | 136203938 | 139366471 | 3.08e-02 | <i>CHRM2 DGKI CREB3L2 ZC3HAV1 TBXAS1</i>                                         |
| chr7  | 150709139 | 158073179 | 7.08e-03 | <i>MLL3 ACTR3B PTPRN2 DPP6 PRKAG2 CNPY1 WDR86</i>                                |
| chr8  | 105570642 | 114518418 | 7.65e-03 | <i>PKHD1L1 RSPO2 ANGPT1 CSMD3 LRP12</i>                                          |
| chrX  | 49250566  | 51662188  | 3.34e-02 | <i>NUDT11 GAGE1 CCNB3 SHROOM4 MAGED1</i>                                         |
| chrX  | 54850895  | 56328252  | 3.34e-02 | <i>MAGEH1 ALAS2 MAGED2 RRAGB KLF8</i>                                            |
| chrX  | 101853995 | 105339604 | 3.34e-02 | <i>MUM1L1 GPRASP2 MCART6 WBP5 TCEAL8 TCEAL7 NGFRAP1</i>                          |

\*Chr, Chromosome; †Beginning site of the cluster; ‡Ending site of the cluster; §p values indicate the significance of the clustering.

**Table S6. Summary of genes with expression alterations (fold of change >1.5) in MSC cocultured with Panc10.05T vs. singly cultured MSC in both methylated genes (beta value > 0.5) and unmethylated genes (beta value < 0.5), respectively**

| <b>Methylation status</b>     | <b>Gene Expression Alteration (p&lt;0.001)</b> |                       |                           |
|-------------------------------|------------------------------------------------|-----------------------|---------------------------|
|                               | Fold of Increase > 1.5                         | Fold of Decrease <1.5 | No Significant Alteration |
| Methylated genes<br>(n=36426) | 7325                                           | 13234                 | 15867                     |
| Unmethylated<br>(n=36416)     | 11329                                          | 12740                 | 12347                     |



## Supplementary Figures

### Figure S1

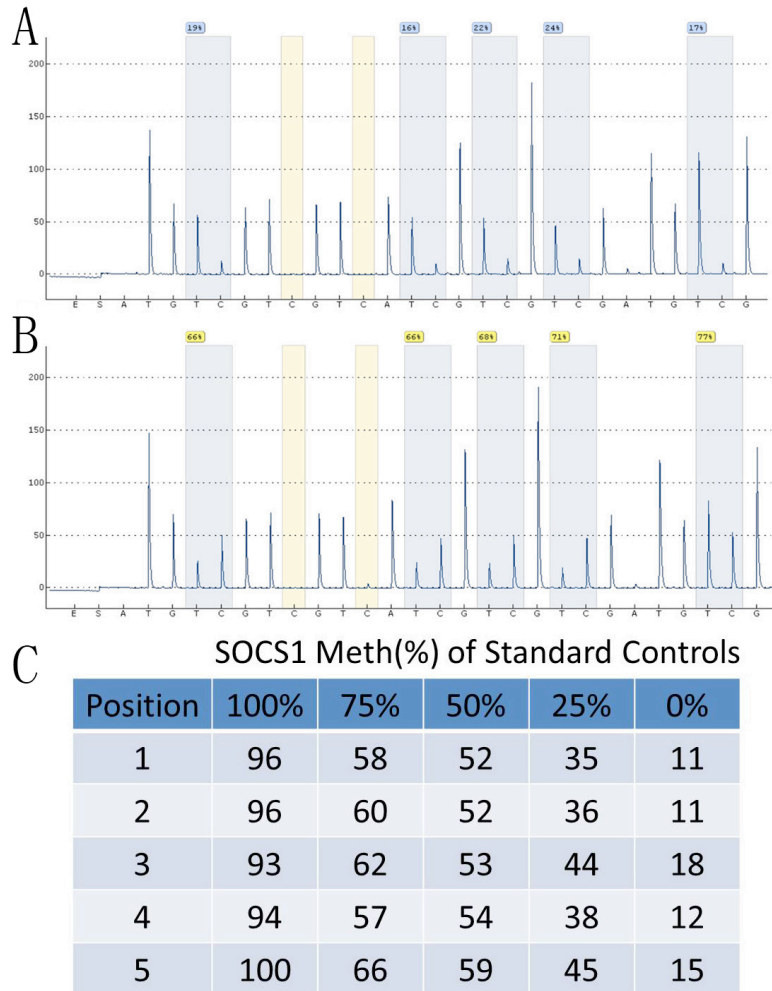

Figure S2

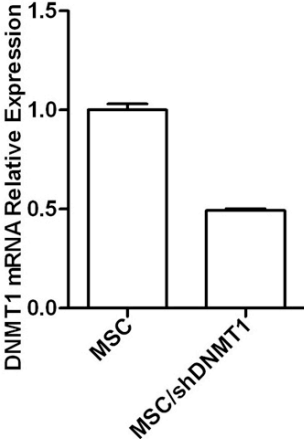

Figure S3

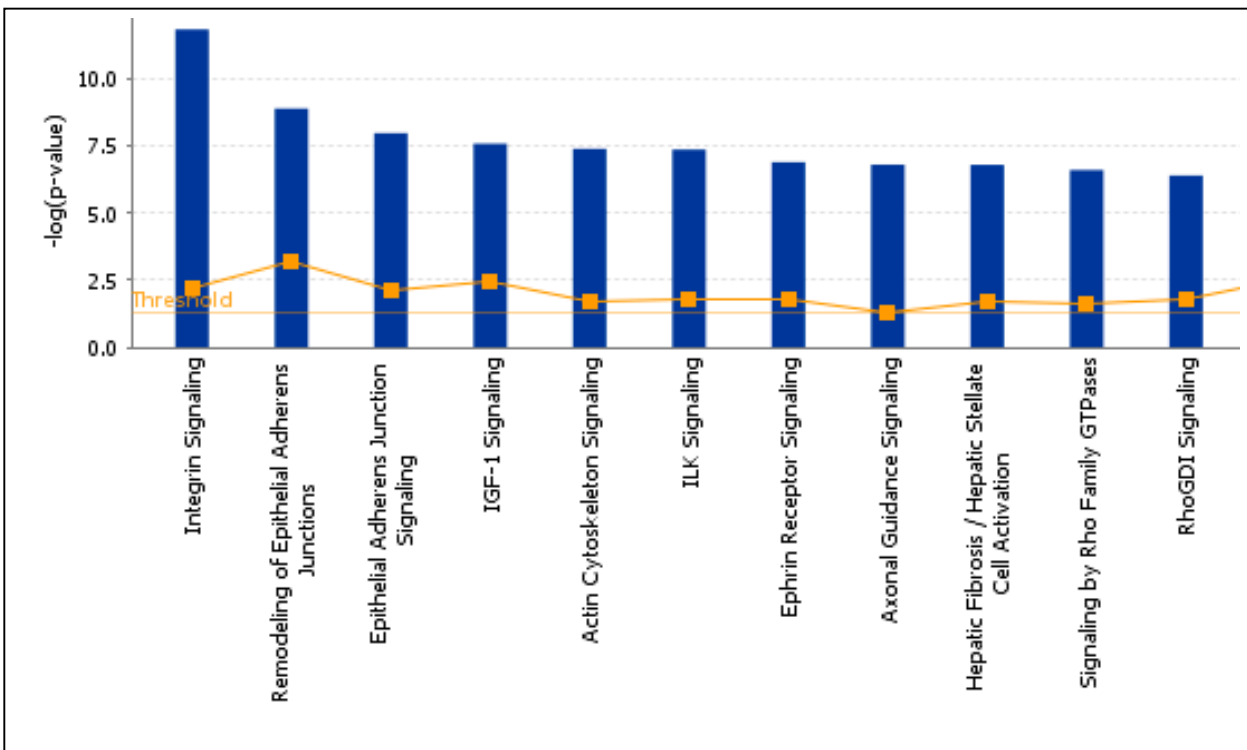

Figure S4

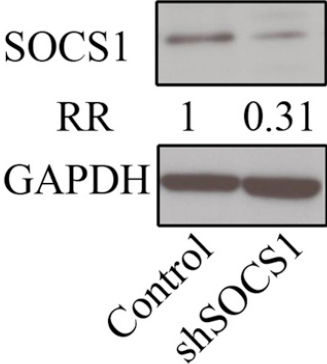

Supplement: NIHMS808607-supplement-1.pdf [file NIHMS808607-supplement-1.pdf]
