# Supplementary material
Source: PubMed Central journal article supplement (PMC5026619)
Supplement: NIHMS808607-supplement-2.pdf [file NIHMS808607-supplement-2.pdf]

## Supplemental Figure Legends

**Figure S1.** Representative pyrosequencing results. (A) Pyrosequencing of SOCS1 methylation in MSCs. (B) Pyrosequencing of SOCS1 methylation in MSCs after co-cultured with Panc10.05Tumor. (C) Experimental standards of pyrosequencing of SOCS1 methylation.

**Figure S2.** DNMT1 mRNA expression in MSC cells following shRNA knockdown of DNMT1. DNMT1 mRNA expression was quantified by qPCR. Shown are the relative ratios of DNMT1 in MSCs with DNMT1 shRNA (shDNMT1) to that in MSCs with control shRNA. GAPDH expression was used for normalization.

**Figure S3.** Pathways most significantly upregulated in CAFs upon co-culturing with PDAC tumor cells. The microarray gene expression data obtained from CAFs and MSCs before and after co-culturing with PDAC tumor cells were analyzed by the Ingenuity Pathway Analysis Software.

**Figure S4.** SOCS1 expression in MSC cells following shRNA knockdown of SOCS1. SOCS1 expression was examined by Western blot analysis and quantified by using the ImageJ software. The relative ratio (RR) of SOCS1 protein expression in cells with SOCS1 shRNA to that in cells with control shRNA (control) is shown.
